# Supplementary material
Source: PubMed Central journal article supplement (PMC6640738)
Supplement: ao6b00208_si_001.pdf [file ao6b00208_si_001.pdf]

## Supplementary Information

# Structure of Spherulites in Insulin, $\beta$ -Lactoglobulin and Amyloid $\beta$

Danielle Cannon<sup>†,§</sup>, Stephen J. Eichhorn<sup>‡,||</sup>, Athene M. Donald<sup>\*,†</sup>

<sup>†</sup>Cavendish Laboratory, University of Cambridge, JJ Thomson Avenue, CB3 0HE, Cambridge, U.K.

<sup>‡</sup>School of Materials, University of Manchester, Sackville Street, M13 9PL, Manchester, U.K.

\* To whom correspondence should be addressed: amd3@cam.ac.uk

<sup>§</sup>Present Address: Medical Research Council Laboratory for Molecular Cell Biology and Department of Cell and Developmental Biology, University College London, Gower Street, WC1E 6BT, London, United Kingdom

<sup>||</sup>Present Address: College of Engineering, Mathematics and Physical Sciences, Harrison Building, University of Exeter, North Park Road, EX4 4QF, Exeter, United Kingdom

Figure S1

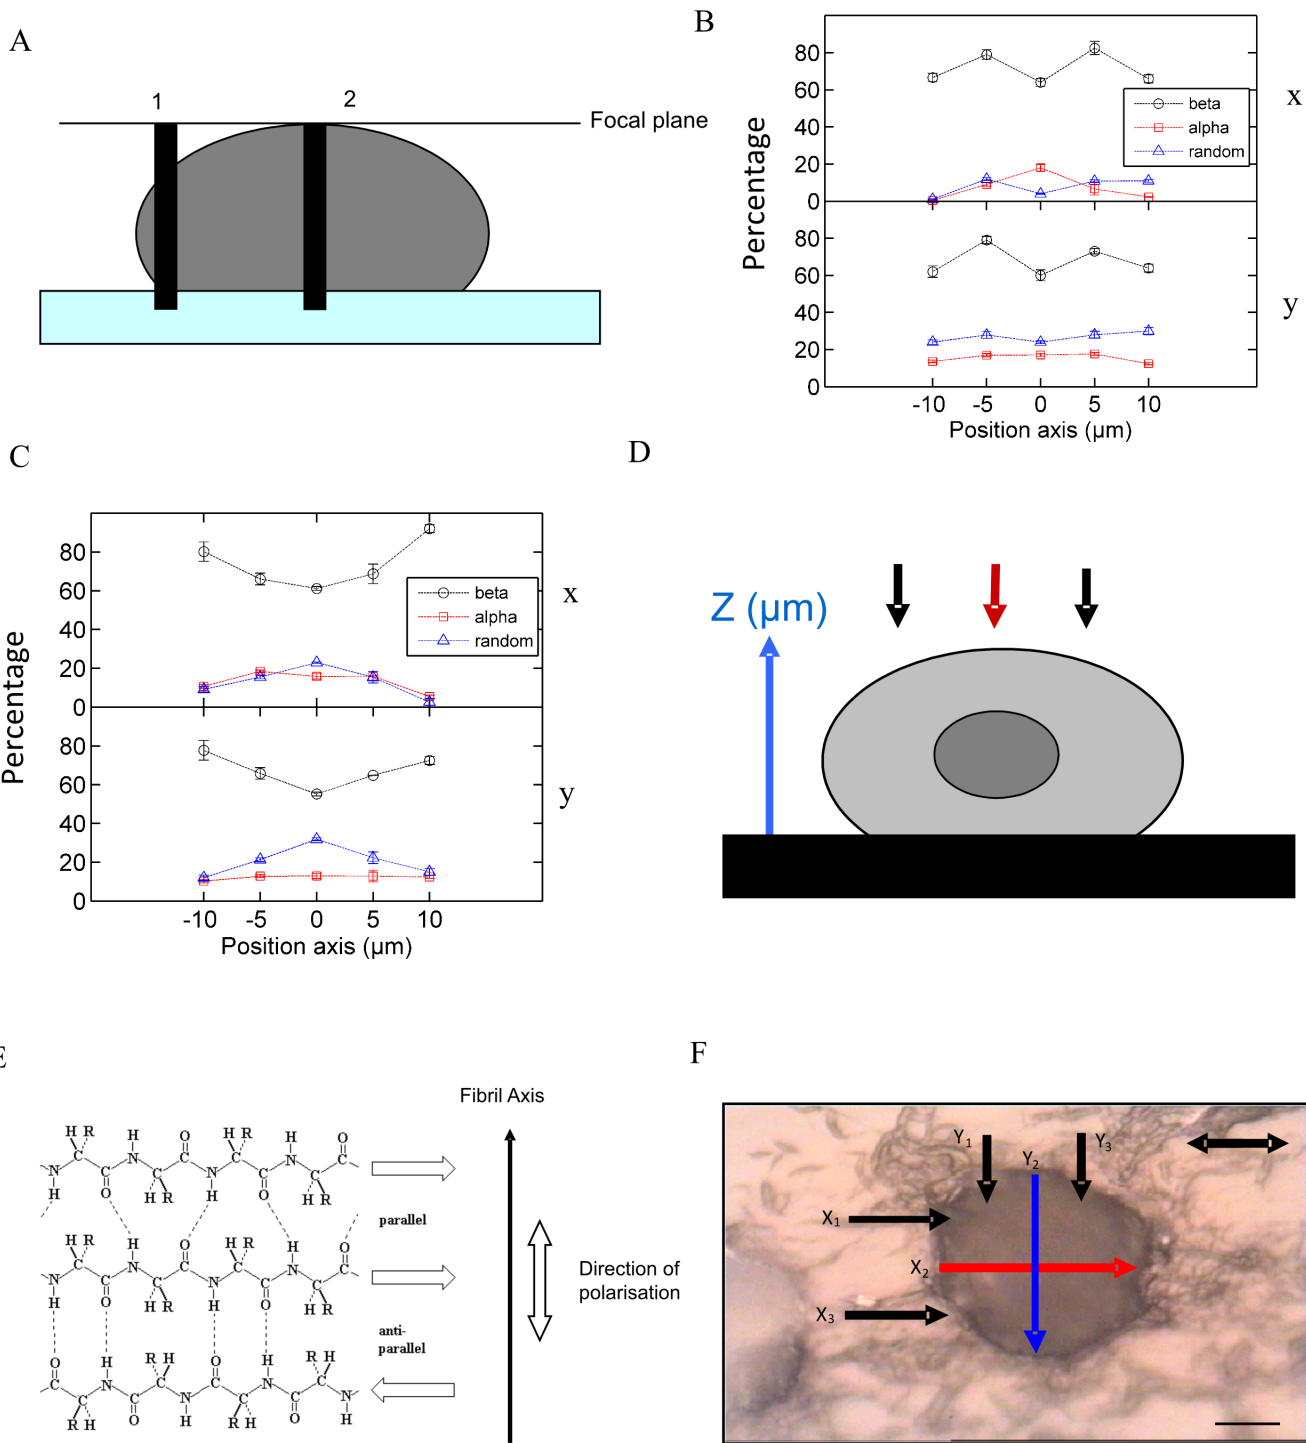

Figure S2

A

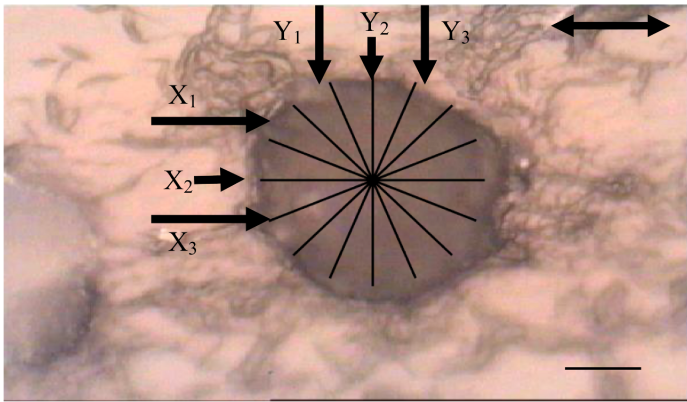

B

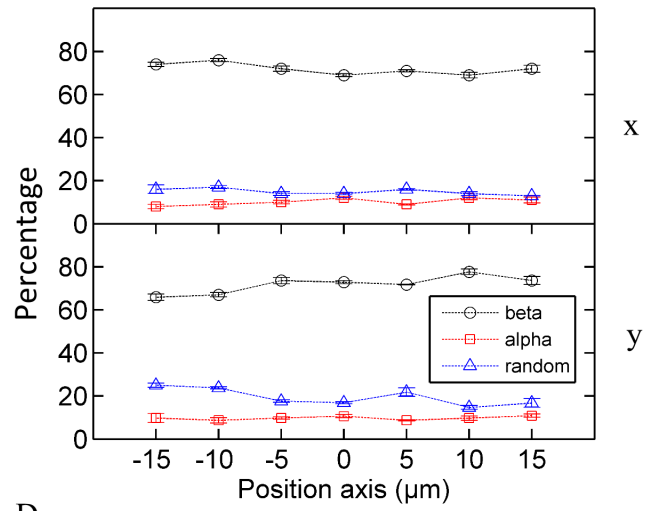

C

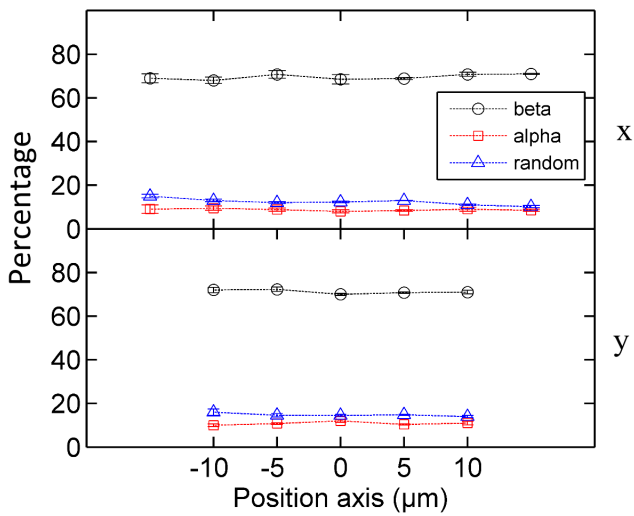

D

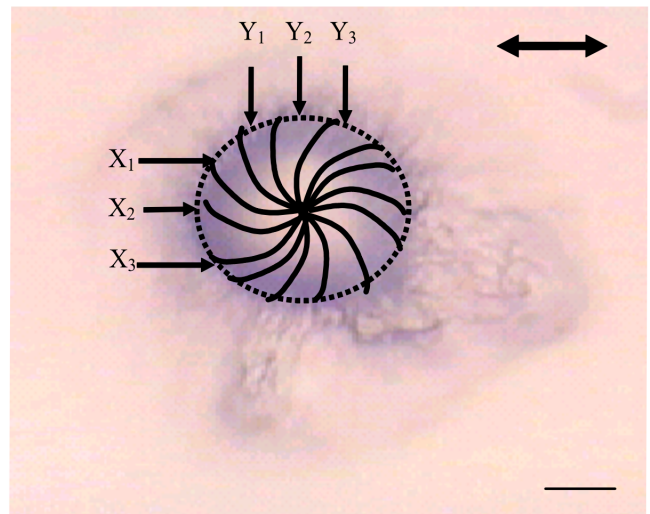

E

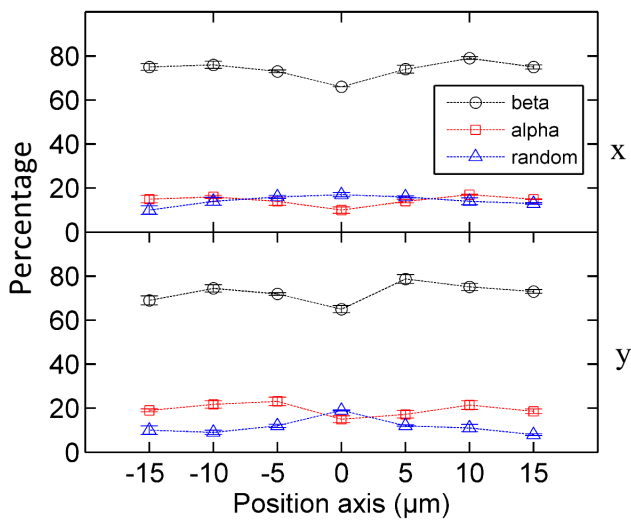

F

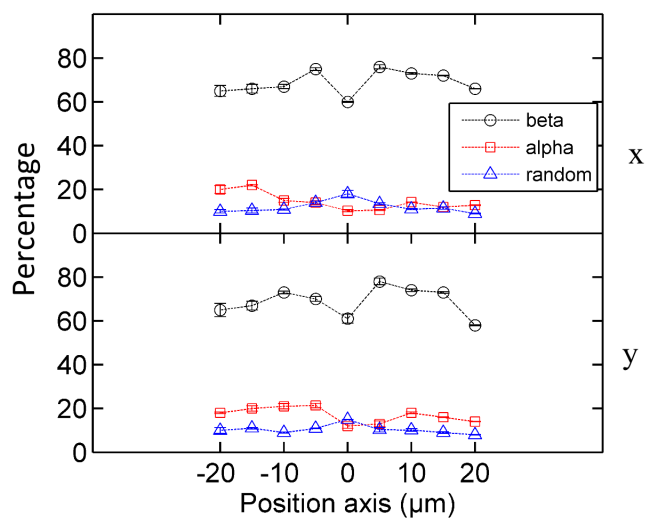

Figure S1 A) Schematic diagram of laser penetration through a spherulite, where the material volume will be significantly greater at position 2 than at position 1. B) Percentage contributions of  $\beta$ -sheet,  $\alpha$ -helix and random coil in the x- and y-direction within a second insulin spherulite. C) Percentage contributions of  $\beta$ -sheet,  $\alpha$ -helix and random coil in the x- and y-direction within a third insulin spherulite. D) Schematic side-on view of insulin spherulite on coverslip, where the dark shaded area represents the core. Blue arrow indicates increasing depth within the spherulite. The  $\beta$ -sheet content was recorded at three locations indicated by the black and red arrows. E) Schematic image showing  $\beta$ -strands within an amyloid fibril. F) an insulin spherulite visualized using confocal microscopy in 2D; the direction of the laser polarization is given by the black double headed arrow which is parallel to the defined x-axis of the spherulite. The intensity across the spherulite is recorded along six paths; three in the x-direction,  $X_1$ ,  $X_2$  and  $X_3$  and three in the y-direction  $Y_1$ ,  $Y_2$  and  $Y_3$ , where  $X_2$  and  $Y_2$  go through the core. Scale bar 10  $\mu\text{m}$ .

Figure S2 A) Schematic interpretation of an insulin spherulite with radiating fibrils from the core to the edge. Black double headed arrow shows the direction of polarization. Single headed arrows show the direction of measurements in the x- and y- direction. Scale bar 10  $\mu\text{m}$ . B) Percentage of  $\beta$ -sheet,  $\alpha$ -helix and random coil across a second BLG spherulite in the x- and y-direction. C) Percentage of  $\beta$ -sheet,  $\alpha$ -helix and random coil across a third BLG spherulite in the x- and y-direction. D) Schematic interpretation of BLG spherulite with spiralling fibrils from the core to the edge. Black doubled headed arrow shows the direction of polarization. Single headed arrows show the direction of measurements in the x and y directions. Scale bar 10  $\mu\text{m}$ . E) Percentage of  $\beta$ -sheet,  $\alpha$ -helix and random coil across a second A $\beta$ 40 spherulite in the x- and y-direction. F) Percentage of  $\beta$ -sheet,  $\alpha$ -helix and random coil across a third A $\beta$ 40 spherulite the x- and y-direction.
